# Supplementary material
Source: PubMed Central journal article supplement (PMC3100744)
Supplement: supp_jc.2010-2814_10-2814_Tab_1.pdf [file supp_jc.2010-2814_10-2814_Tab_1.pdf]

**Supplemental Table1: Characteristics of Mothers and Babies studied**

265

| <b>Characteristic (n=905)</b>                         | <b>Mean (SD) unless otherwise stated</b> |
|-------------------------------------------------------|------------------------------------------|
| <b>Maternal Age (y)</b>                               | 30 (5.2)                                 |
| <b>Maternal BMI (median (IQR)) (kg/m<sup>2</sup>)</b> | 27 (24.7, 30.2)                          |
| <b>Maternal Glucose (mmol/l)</b>                      | 4.3 (0.4)                                |
| <b>Maternal smoking during pregnancy n(%)</b>         | 119 (13%)                                |
| <b>Parity (Primips / Multips) n (%)</b>               | 412 (45.5%) / 493 (54.5%)                |
| <b>Socio-economic status (Townsend score)</b>         | 0.3 (3.2)                                |
| <b>Gestational age at delivery (weeks)</b>            | 40.1 (1.2)                               |
| <b>Baby's birthweight (g)</b>                         | 3500 (474)                               |
| <b>Baby's sex (male / female) n(%)</b>                | 466 (51.5%) / 439 (48.5%)                |

266
